# Supplementary material for: Annual 30-meter Dataset for Glacial Lakes in High Mountain Asia from 2008 to 2017
Source: Copernicus journal article supplement (doi:10.5194/essd-2020-57), 2020-04-15
Supplement: Supplementary file [file essd-2020-57-RC1-supplement.pdf]

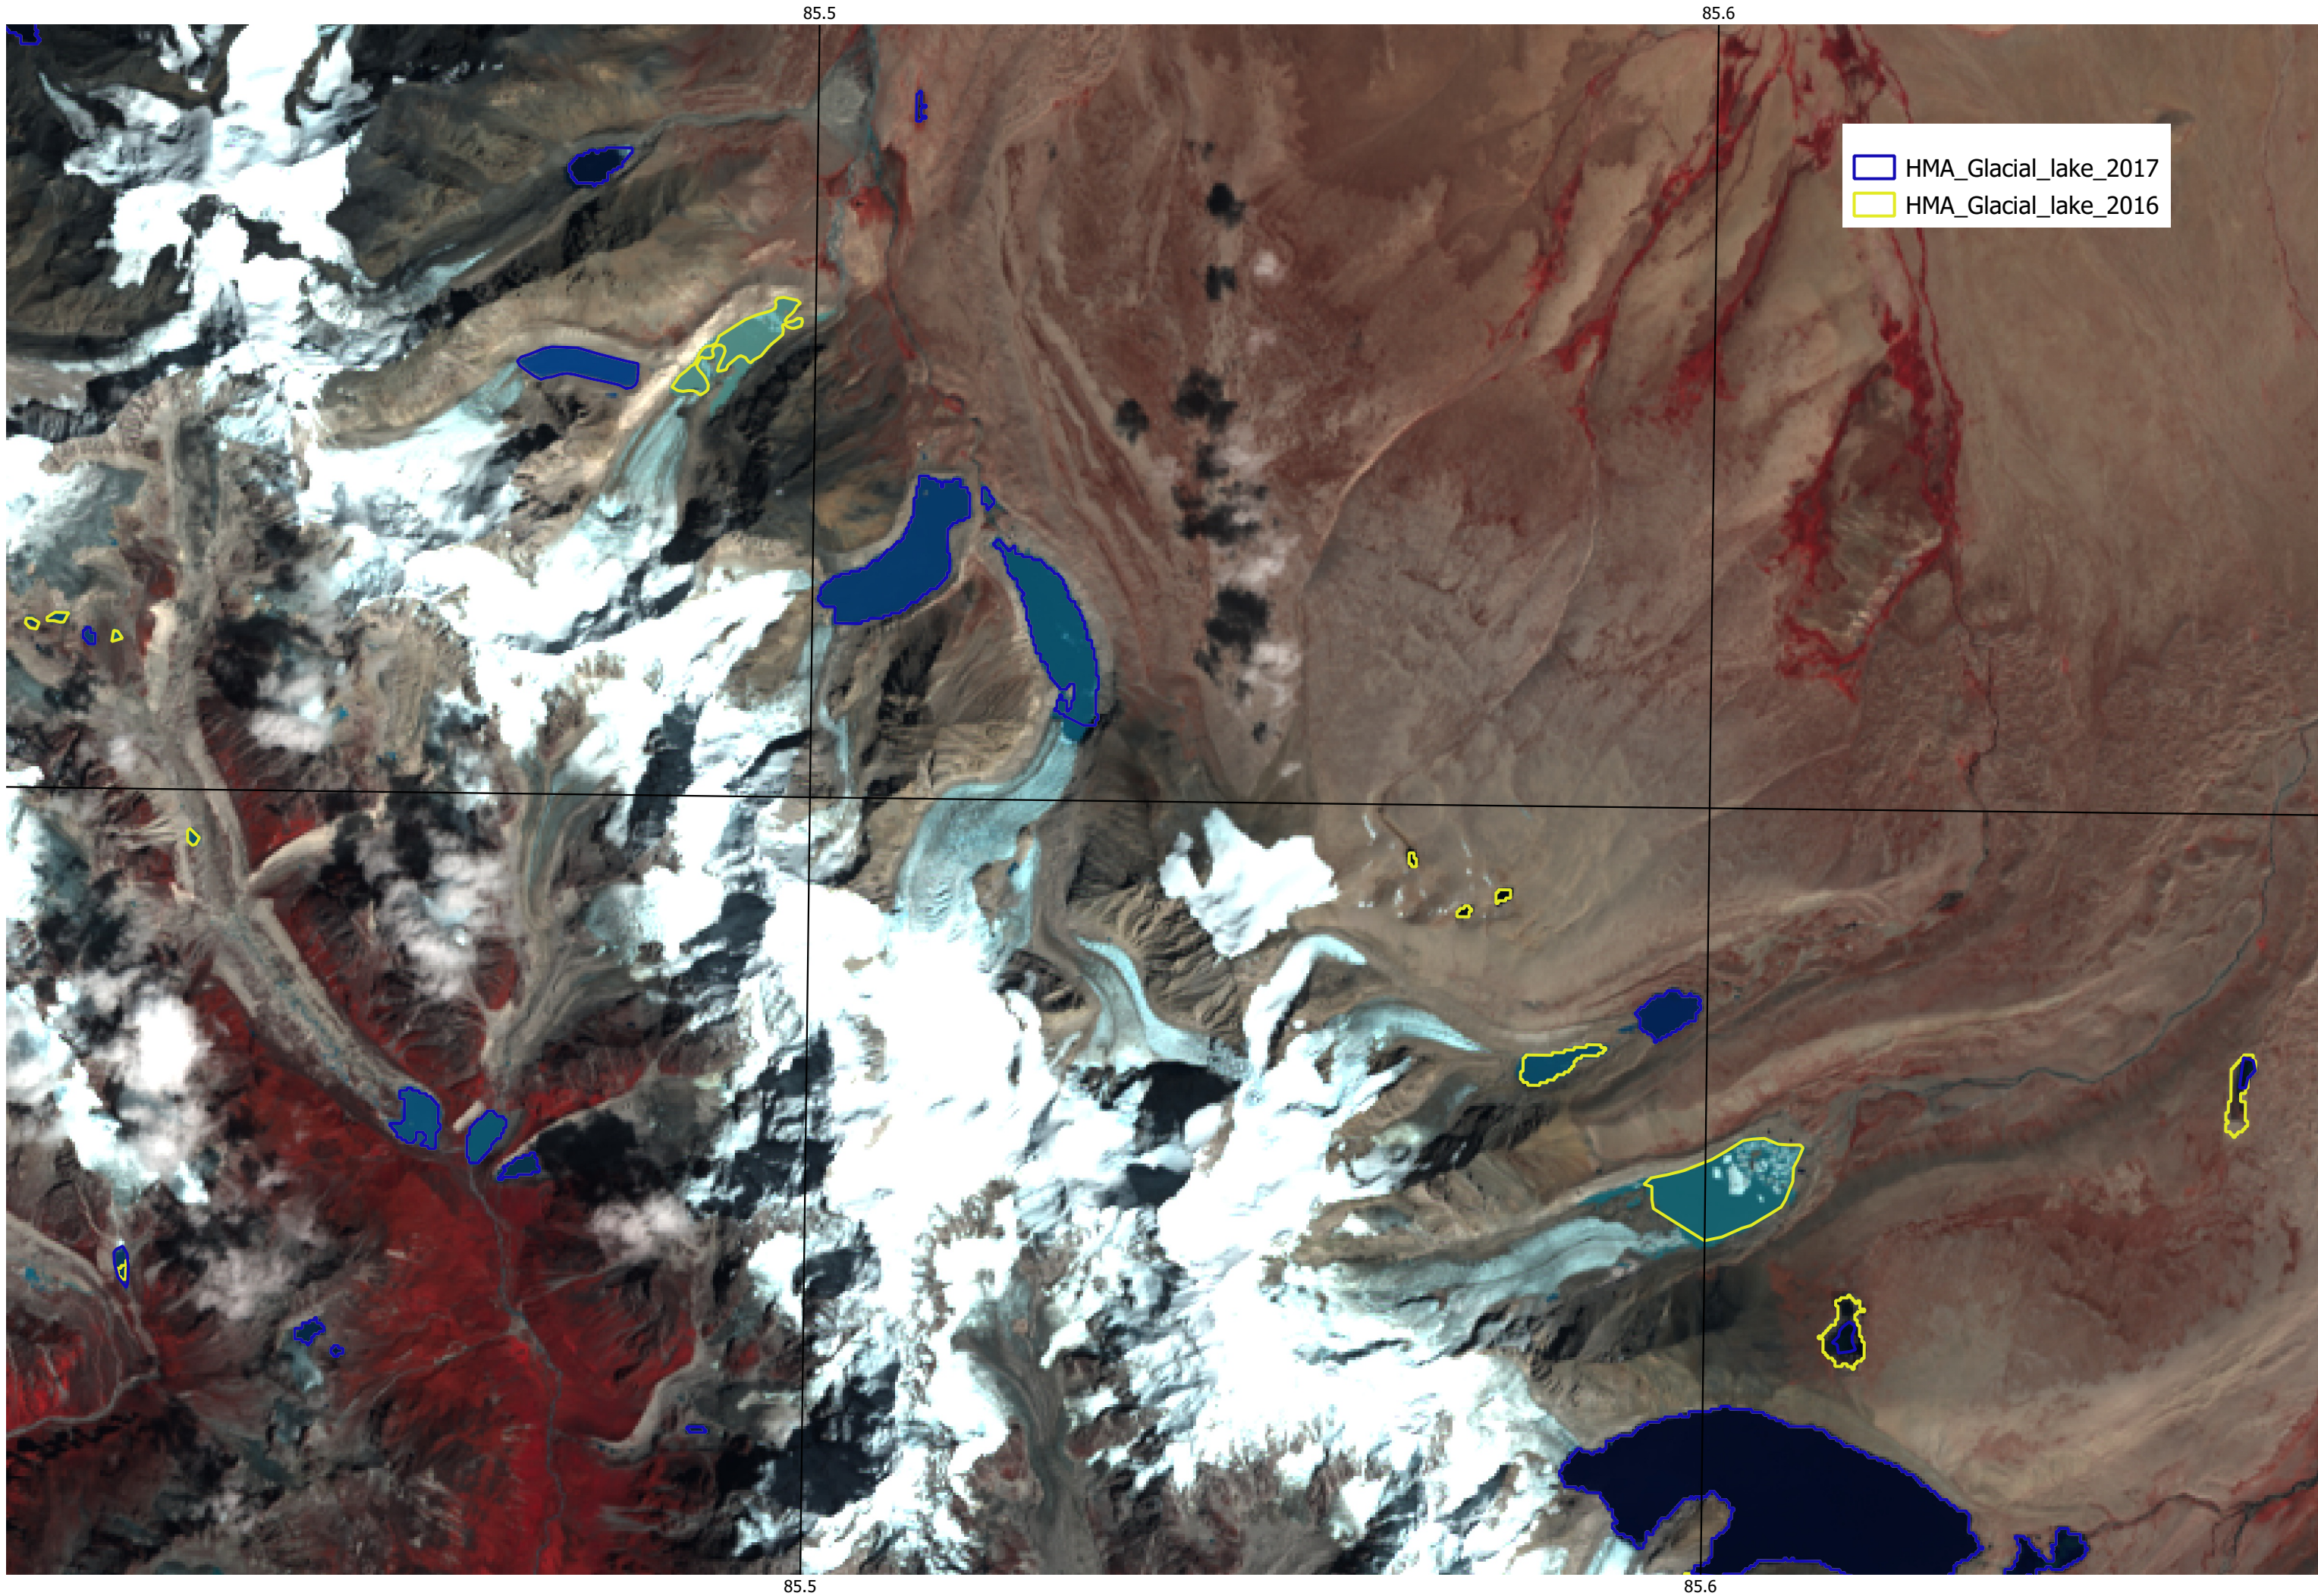

85.5

85.6

HMA\_Glacial\_lake\_2017  
HMA\_Glacial\_lake\_2016

28.6

28.6

85.5

85.6
